# Supplementary material for: Biomarkers of Cardiovascular Risk in Patients With Rheumatoid Arthritis: Results From the TARGET Trial
Source: PubMed Central journal article supplement — J Am Heart Assoc. 2024 Feb 28;13(5):e032095. doi: 10.1161/JAHA.123.032095 (PMC10944054; doi:10.1161/jaha.123.032095), 2024-02-28
Supplement: JAH3-13-e032095-s001.pdf [file JAH3-13-e032095-s001.pdf]

# **SUPPLEMENTAL MATERIAL**

**Data S1.**

**Supplemental Methods for Handling Biomarkers: Missing Data**

| Biomarker                          | Missing/Imputation information                                                                                     |
|------------------------------------|--------------------------------------------------------------------------------------------------------------------|
| <b>Cytokines/Inflammation</b>      |                                                                                                                    |
| IL-6                               | 413 (72%) under detection limit – Using Vectra instead<br>-Also dichotomized at detection limit, 2.6               |
| sTNF-R1                            | Not in Discovery Map, but in Vectra                                                                                |
| Serum amyloid A (SAA)              | 7 (1%) above detection – imputed as highest limit                                                                  |
| hsCRP                              | 102 (18%) above detection – imputed as highest limit, comparing with Vectra and BCH                                |
| CD-40 ligand                       | 4 (0.7%) below detection – imputed as ½ lower limit                                                                |
| Macrophage Inhibitory Factor (MIF) | 83 (14%) below detection – imputed as ½ lower limit                                                                |
| <b>Lipid Parameters</b>            |                                                                                                                    |
| Apolipoprotein A1                  | 0 missing                                                                                                          |
| Apolipoprotein A2                  | 0 missing                                                                                                          |
| Apolipoprotein B                   | 2 missing (QNS) – removed 2                                                                                        |
| Apolipoprotein C1                  | 0 missing                                                                                                          |
| Apolipoprotein C3                  | 0 missing                                                                                                          |
| Apolipoprotein H                   | 0 missing                                                                                                          |
| Apolipoprotein(a) aka Lp(a)        | 0 missing                                                                                                          |
| oxLDL (not measured)               | Not in Discovery Map                                                                                               |
| LOX-1                              | 245 (43%) outside detection -dichotomized at lower detection limit, 0.2                                            |
| <b>Adipokines</b>                  |                                                                                                                    |
| Adiponectin                        | 0 missing                                                                                                          |
| Leptin                             | 0 missing                                                                                                          |
| Resistin                           | 1 (0.1%) above detection – imputed as highest limit                                                                |
| <b>Atherothrombosis</b>            |                                                                                                                    |
| Antithrombin III                   | 90 (16%) above detection – imputed as highest limit                                                                |
| PAI-1                              | 0 missing                                                                                                          |
| <b>Miscellaneous</b>               |                                                                                                                    |
| Cardiac troponin                   | Not in Discovery map, but in BCH – 46% of values below detection limit, dichotomized at lower detection limit, 6.0 |
| Nt-pro-BNP                         | 0 missing                                                                                                          |
| VCAM-1                             | 0 missing                                                                                                          |
| VEGF                               | 1 below detection – imputed as ½ lowest limit                                                                      |
| MMP-1                              | 298 (52%) outside detection – Using Vectra instead<br>-dichotomized at lower limit, 0.31                           |
| MMP-3                              | 3 (0.5%) above detection – imputed as highest limit                                                                |
| YKL-40                             | 0 missing                                                                                                          |
| Cystatin-C                         | 0 missing                                                                                                          |
| Osteopontin                        | 1 (0.1%) below detection – imputed as ½ lowest limit                                                               |

|                      |           |
|----------------------|-----------|
| Osteoprotegrin (OPG) | 0 missing |
|----------------------|-----------|

**Supplemental Methods for Handling Biomarkers: Correlation between Discovery map and Vectra Biomarkers**

| Biomarker      | Spearman Correlation Estimate | Spearman P-value | Pearson Correlation Estimate | Pearson P-value |
|----------------|-------------------------------|------------------|------------------------------|-----------------|
| Leptin         | 0.96                          | <0.0001          | 0.94                         | <0.0001         |
| SAA            | 0.95                          | <0.0001          | 0.93                         | <0.0001         |
| MMP3           | 0.95                          | <0.0001          | 0.89                         | <0.0001         |
| Resistin       | 0.76                          | <0.0001          | 0.79                         | <0.0001         |
| VCAM1          | 0.69                          | <0.0001          | 0.69                         | <0.0001         |
| VEGF           | 0.39                          | <0.0001          | 0.36                         | <0.0001         |
| YKL40          | 0.95                          | <0.0001          | 0.98                         | <0.0001         |
| hsCRP          | 0.97                          | <0.0001          | 0.55                         | <0.0001         |
| BCH x DM hsCRP | 0.98                          | <0.0001          | 0.60                         | <0.0001         |

Note – of the 125 individuals with Baseline TBR, 5 of them do not have baseline lab values, and one individual is a TBR outlier, bringing our population down to 119.

Accuracy of Dichotomized Variables in Discovery Map vs Vectra (MMP1 and IL6)

-In Discovery Map dichotomized at limit of detection, in Vectra dichotomized at MEDIAN

| Discovery Map MMP1    | Vectra MMP1 (Median = 7872) |              |
|-----------------------|-----------------------------|--------------|
|                       | Above Median                | Below Median |
| Above Detection Limit | 41                          | 24           |
| Below Detection Limit | 19                          | 35           |

Accuracy: 0.64

| Discovery Map IL6     | Vectra IL6 (Median = 10.4) |              |
|-----------------------|----------------------------|--------------|
|                       | Above Median               | Below Median |
| Above Detection Limit | 35                         | 5            |
| Below Detection Limit | 25                         | 54           |

Accuracy: 0.75

Supplemental Methods for Handling Biomarkers: Scatterplots of Biomarkers in Multiple Platforms

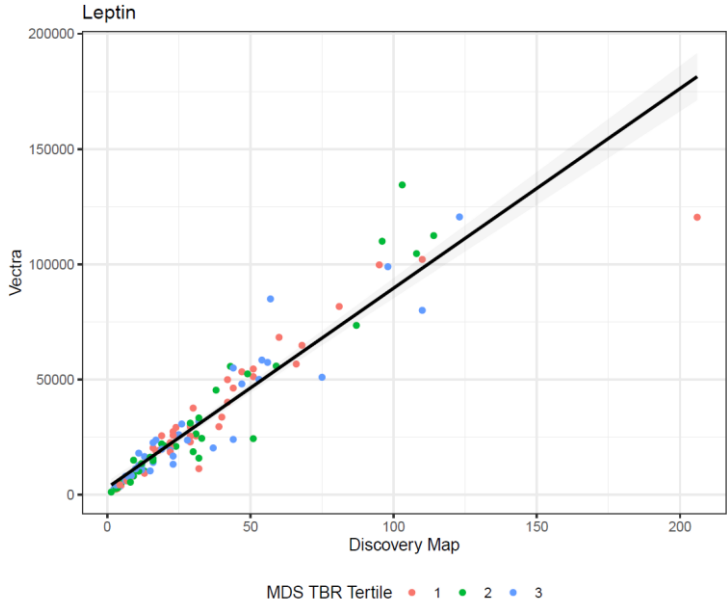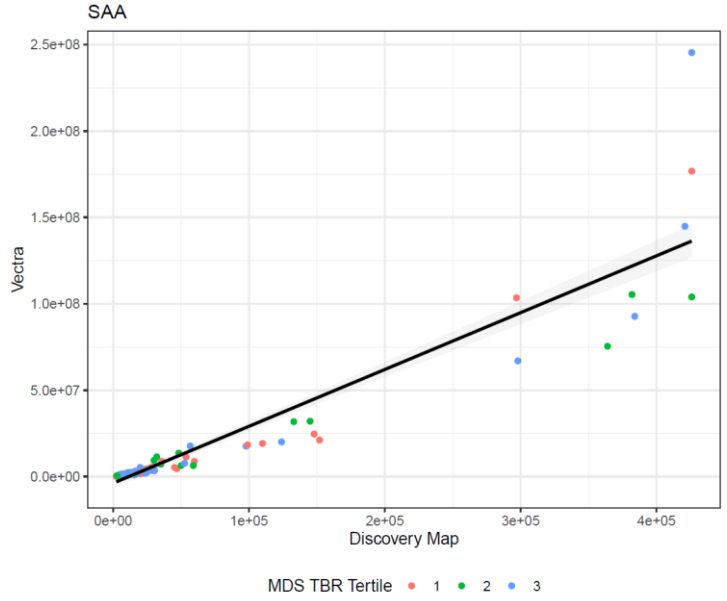

MMP3

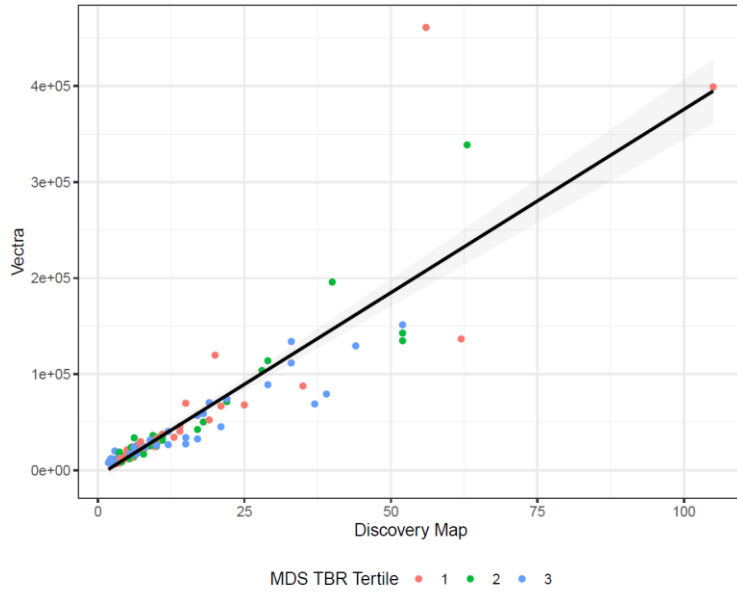

Resistin

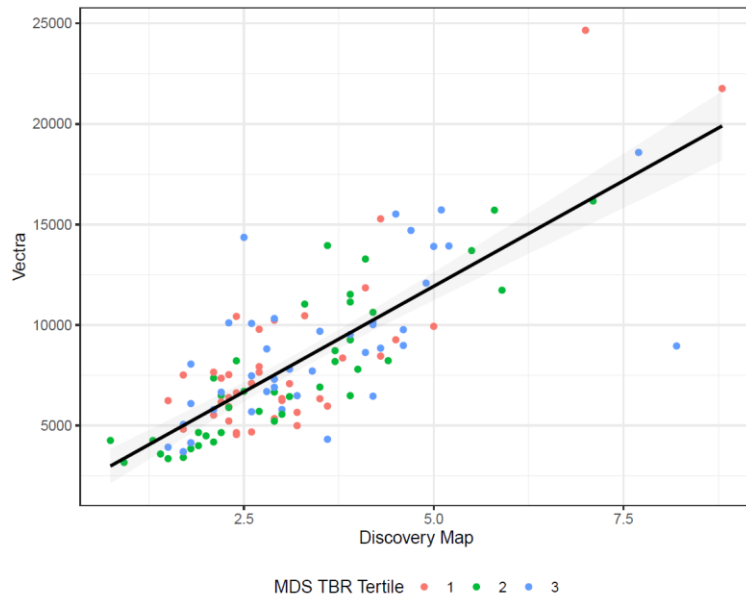

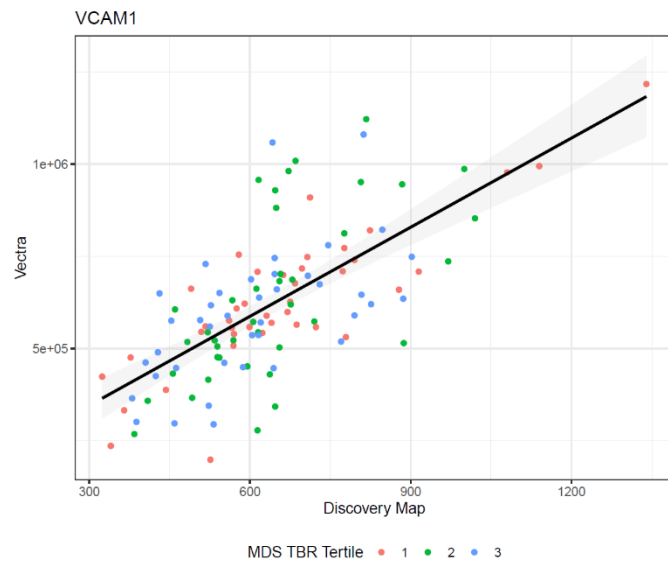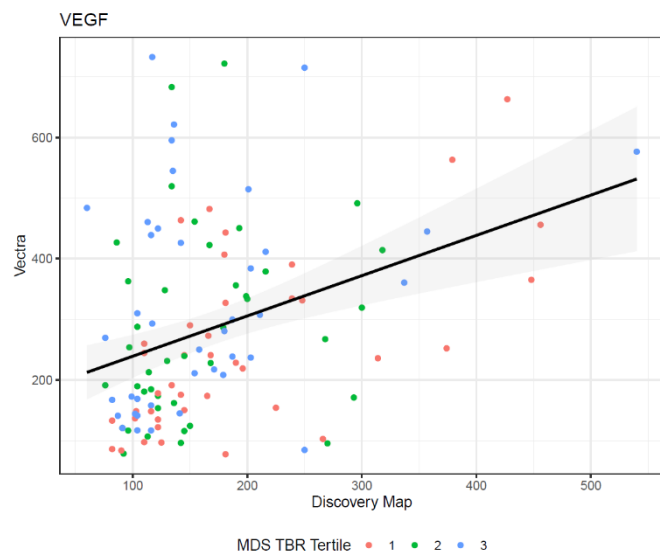

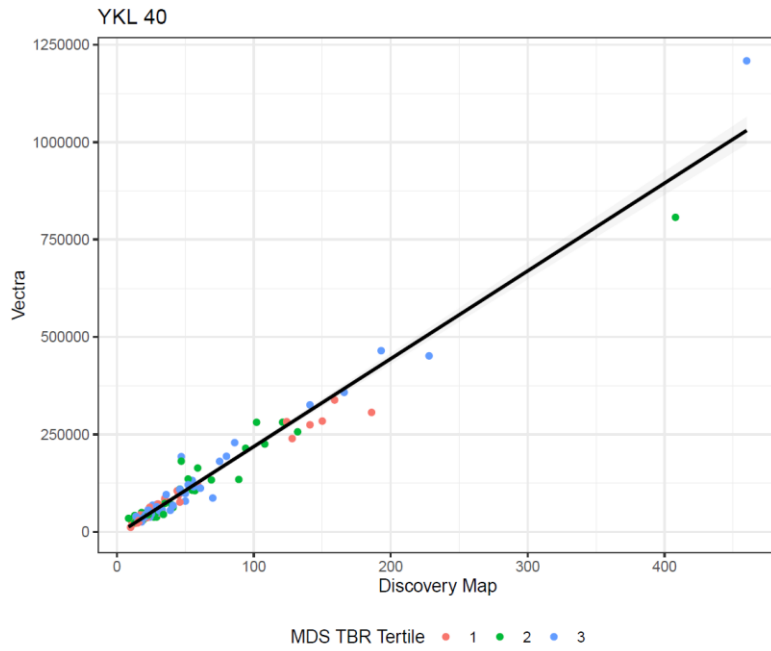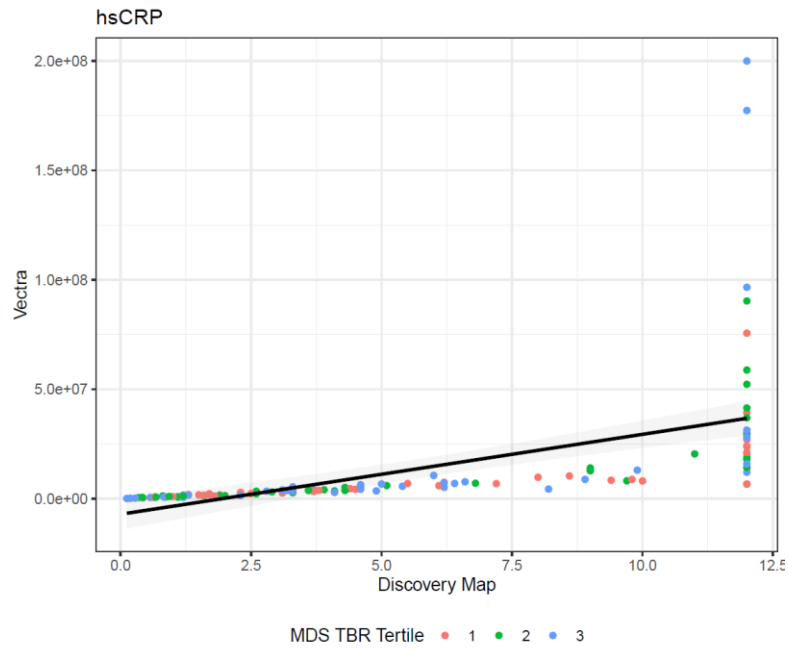

**Table S1. Selected Biomarkers and Selected References Describing their Relationships with RA and CVD.**

| <b>Cytokine/Inflammation</b> | <b>Results related to RA</b>                                                                                 | <b>Results related to CVD</b>                                                                                 |                                    |
|------------------------------|--------------------------------------------------------------------------------------------------------------|---------------------------------------------------------------------------------------------------------------|------------------------------------|
| IL-6                         | Multifactorial roles <sup>63, 64</sup> ; antagonists effective for RA treatment <sup>65</sup>                | Strong association with CV events <sup>66, 67</sup> ; associated with atherosclerosis <sup>68</sup>           | pg/mL                              |
| sTNF-R1 and R2               | Important in rheumatoid synovitis <sup>69</sup> ; antagonists effective for RA treatment <sup>70</sup>       | Association with CV events <sup>71, 72</sup>                                                                  | pg/mL                              |
| SAA                          | Produced by rheumatoid synovium <sup>73</sup>                                                                | Association with CAD <sup>74</sup>                                                                            | ng/mL                              |
| CRP                          | Strong association with disease activity <sup>75</sup> and radiographic progression <sup>76</sup>            | Association with CV risk factors <sup>77</sup> ; strong and consistent association with CV risk <sup>78</sup> | ug/mL                              |
| CD-40 ligand                 | Strong association with disease activity <sup>79</sup> ; over-expressed in rheumatoid synovium <sup>80</sup> | Strong association with CV events <sup>81</sup> ; CD40 ligand stabilizes plaques <sup>82</sup>                | ng/mL                              |
| <b>Adipokines</b>            |                                                                                                              |                                                                                                               |                                    |
| Adiponectin                  | Associated with BMI and x-ray damage <sup>83</sup> ; associated with disease activity <sup>84</sup>          | Associated with reduced CV risk <sup>85</sup>                                                                 | ug/mL                              |
| Leptin                       | Associated with disease activity <sup>84</sup>                                                               | Association with CV risk <sup>86</sup>                                                                        | ng/mL                              |
| Resistin                     | Associated with disease activity <sup>84</sup>                                                               | Associated with CV risk <sup>87</sup>                                                                         | ng/mL                              |
| <b>Atherothrombosis</b>      |                                                                                                              |                                                                                                               |                                    |
| Antithrombin III             | Elevated levels found in rheumatoid synovial fluid <sup>88</sup>                                             | Strong association with CV events <sup>89</sup>                                                               | ug/mL                              |
| PAI 1                        | Elevated levels found in rheumatoid synovial fluid <sup>90</sup>                                             | Localized in atherosclerotic plaque <sup>91</sup>                                                             | ng/mL                              |
| <b>Lipids Parameters</b>     |                                                                                                              |                                                                                                               |                                    |
| Apolipoproteins              | Predicts response to TNFi treatment <sup>92</sup>                                                            | Apolipoprotein sub-fractions predict CV events <sup>93</sup>                                                  | A1: mg/mL<br>A2: ng/mL<br>B: ug/mL |
| Lp (a)                       | Strongly associated with inflammation in RA <sup>94</sup>                                                    | Lp(a) associates with CVD progression/events <sup>95</sup>                                                    | ug/mL                              |
| LDL                          | Associated with radiographic progression <sup>96</sup>                                                       | Strong, consistent relationship with CV events <sup>97</sup>                                                  | mg/dL                              |
| <b>Other Analytes</b>        |                                                                                                              |                                                                                                               |                                    |
| Cardiac troponins            | Associated with disease activity <sup>98</sup>                                                               | hsTroponin associated with future CV events <sup>99</sup>                                                     | ng/L                               |
| nt-pro-BNP                   | Associated with disease activity <sup>100</sup>                                                              | nt-pro-BNP associated with CV ischemia <sup>101</sup>                                                         | pg/mL                              |
| VCAM-1                       | Expressed in rheumatoid synovium <sup>102</sup>                                                              | VCAM-1 associated with future CV events <sup>103</sup>                                                        | ng/mL                              |
| VEGF-A                       | Associated with disease activity <sup>104</sup>                                                              | VEGF regulates ischemia in CVD <sup>105</sup>                                                                 | pg/mL                              |
| MMP-1 and MMP-3              | Both associated with disease progression <sup>106</sup>                                                      | MMP-1 associated with plaque burden <sup>107</sup>                                                            | ng/mL                              |
| YKL-40                       | Elevated levels associated with disease activity <sup>108</sup>                                              | Elevations associated with strokes on women <sup>109</sup>                                                    | ng/mL                              |
| Cystatin-C                   | Elevated in RA with CVD <sup>110</sup>                                                                       | Elevations in high risk patients associated with CV events <sup>111</sup>                                     | ng/mL                              |
| Osteopontin (OPN)            | Reduced OPN associated with bone destruction <sup>112</sup>                                                  | Increased OPN levels associated with increased CV events <sup>113</sup>                                       | ng/mL                              |
| Osteoprotegrin (OPG)         | Reduced OPG/RANKL associated with bone destruction <sup>114</sup>                                            | OPG increased in CVD <sup>115</sup>                                                                           | pM                                 |



**Table S2. Baseline Characteristics of TARGET Study Subjects Included in the Current Analysis.**

|                                      | All Patients<br>(n=109)               | MTX + TNF<br>inhibitor<br>(n = 55) | Triple therapy<br>(n = 54) |
|--------------------------------------|---------------------------------------|------------------------------------|----------------------------|
|                                      | N (%) or median (interquartile range) |                                    |                            |
| Age, years                           | 58 (54, 65)                           | 58 (54, 66)                        | 58 (54, 64)                |
| Sex, female                          | 77 (71)                               | 36 (65)                            | 41 (76)                    |
| Race                                 |                                       |                                    |                            |
| White                                | 86 (81)                               | 48 (91)                            | 38 (72)                    |
| Black                                | 10 (9.4)                              | 4 (7.5)                            | 6 (11)                     |
| Other                                | 10 (9.4)                              | 1 (1.9)                            | 9 (17)                     |
| Ethnicity                            |                                       |                                    |                            |
| Hispanic                             | 31 (28)                               | 15 (27)                            | 16 (30)                    |
| Non-Hispanic                         | 78 (72)                               | 40 (73)                            | 38 (70)                    |
| RA disease duration, years           | 1.6 (0.5, 6.8)                        | 1.6 (0.5, 7.4)                     | 1.5 (0.6, 5.3)             |
| Serologic status, positive           | 71 (65)                               | 35 (64)                            | 36 (67)                    |
| DAS28-CRP                            | 4.8 (4.0, 5.6)                        | 4.9 (4.0, 5.6)                     | 4.6 (3.7, 5.5)             |
| hsCRP (mg/L)                         | 4 (2, 9)                              | 4 (1, 7)                           | 4 (2, 10)                  |
| Glucocorticoid use                   | 38 (35)                               | 17 (31)                            | 21 (39)                    |
| NSAID use                            | 45 (41)                               | 25 (45)                            | 20 (37)                    |
| Aspirin use                          | 27 (25)                               | 18 (33)                            | 9 (17)                     |
| Methotrexate weekly dose<br>(mg)     | 20.0 (17.5, 25.0)                     | 20.0 (20.0, 25.0)                  | 20.0 (15.0, 25.0)          |
| Heath assessment<br>questionnaire    | 1.25 (0.50, 1.75)                     | 1.13 (0.50, 1.75)                  | 1.25 (0.63, 1.72)          |
| Body mass index (kg/m <sup>2</sup> ) | 29.2 (25.7, 33.2)                     | 29.4 (25.9, 33.6)                  | 28.6 (25.8, 33.1)          |
| Hypertension                         | 50 (46)                               | 26 (47)                            | 24 (44)                    |
| Hyperlipidemia                       | 23 (21)                               | 12 (22)                            | 11 (20)                    |
| Diabetes mellitus                    | 2 (1.8)                               | 2 (3.6)                            | 0 (0.0)                    |
| Tobacco use                          |                                       |                                    |                            |
| Current                              | 12 (11)                               | 2 (3.6)                            | 10 (19)                    |
| Past                                 | 28 (26)                               | 18 (33)                            | 10 (28)                    |
| Never                                | 69 (63)                               | 35 (64)                            | 34 (63)                    |
| Statin use                           |                                       |                                    |                            |
| Low-moderate intensity               | 22 (20)                               | 11 (20)                            | 11 (20)                    |

Adapted and used with permission from Annals of the Rheumatic Diseases 2023; 82:324-330.

IQR, inter-quartile range; RA, rheumatoid arthritis; IQR, interquartile range; hsCRP, high sensitivity C-reactive protein; NSAID, non-steroidal anti-inflammatory drugs. DAS28-CRP, disease activity score in 28 joints.

**Table S3. Covariates Stratified by Vascular TBR for TARGET Final Population.**

|                                    | Tertile 1 (1.65 – 2.41)<br>(N=35) | Tertile 2 (2.41 – 2.73)<br>(N=37) | Tertile 3 (2.73 – 4.44)<br>(N=37) | P-value for trend |
|------------------------------------|-----------------------------------|-----------------------------------|-----------------------------------|-------------------|
|                                    | <i>N (%) or median (IQR)</i>      |                                   |                                   |                   |
| <b>Sociodemographic</b>            |                                   |                                   |                                   |                   |
| Age, years                         | 61 (56, 65)                       | 56 (52, 62)                       | 60 (55, 66)                       | 0.96              |
| Sex, female                        | 30 (86%)                          | 23 (62%)                          | 24 (65%)                          | 0.43              |
| <b>Race</b>                        |                                   |                                   |                                   |                   |
| Black                              | 5 (14%)                           | 3 (8.6%)                          | 2 (5.6%)                          | 0.02              |
| White                              | 26 (74%)                          | 31 (89%)                          | 29 (81%)                          | 0.68              |
| Other                              | 4 (11%)                           | 1 (2.9%)                          | 5 (14%)                           | 0.90              |
| <b>Ethnicity</b>                   |                                   |                                   |                                   |                   |
| Hispanic                           | 9 (26%)                           | 10 (27%)                          | 12 (32%)                          | 0.22              |
| Non-Hispanic                       | 26 (74%)                          | 27 (73%)                          | 25 (68%)                          | 0.22              |
| <b>Clinical CV Risk Factors</b>    |                                   |                                   |                                   |                   |
| Blood pressure, systolic           | 126 (117, 133)                    | 129 (121, 142)                    | 130 (116, 145)                    | 0.36              |
| Blood pressure, diastolic          | 74 (68, 80)                       | 79 (75, 84)                       | 76 (70, 86)                       | 0.12              |
| Hypertension treatment, current    | 17 (49%)                          | 14 (38%)                          | 15 (41%)                          | 0.53              |
| Total cholesterol, mg/dl           | 198 (179, 234)                    | 202 (172, 225)                    | 208 (179, 228)                    | 0.59              |
| High density lipoprotein, mg/dl    | 56 (50, 70)                       | 59 (45, 70)                       | 58 (44, 68)                       | 0.60              |
| Tobacco use, current               | 4 (11%)                           | 3 (8.1%)                          | 5 (14%)                           | 0.70              |
| Body mass index, kg/m <sup>2</sup> | 28.5 (25.6, 34.4)                 | 28.2 (26.2, 34.7)                 | 29.8 (27.0, 33.1)                 | 0.90              |
| Diabetes                           | 0 (0%)                            | 0 (0%)                            | 2 (5.4%)                          | ...               |
| Statin use, any                    | 6 (17%)                           | 6 (16%)                           | 10 (27%)                          | 0.40              |

Tests for trend were performed using tertiles as an ordinal variable for continuous demographic characteristics, and using a weighted test of trend of proportions for categorical demographic characteristics.

**Table S4. High Value Candidate Biomarker Values at Baseline Stratified by Baseline Vascular TBR for TARGET Final Population.**

|                                    | Tertile 1                    | Tertile 2             | Tertile 3              | P-value for trend |
|------------------------------------|------------------------------|-----------------------|------------------------|-------------------|
|                                    | <i>N (%) or median (IQR)</i> |                       |                        |                   |
| <b>Cytokines/Inflammation</b>      |                              |                       |                        |                   |
| IL-6                               | 11 (8, 21)                   | 10 (5, 19)            | 9 (7, 21)              | 0.31              |
| sTNF-R1                            | 1,344 (1,087, 1,885)         | 1,283 (1,001, 1,680)  | 1,487 (1,130, 1,801)   | 0.67              |
| Serum amyloid A (SAA)              | 19,950 (11,150, 38,150)      | 9,940 (6,135, 31,100) | 15,300 (7,800, 26,050) | 0.67              |
| hsCRP                              | 4.3 (1.9, 9.9)               | 4.1 (2.0, 12.0)       | 4.6 (1.8, 7.4)         | 0.53              |
| CD-40 ligand                       | 0.13 (0.07, 0.29)            | 0.08 (0.06, 0.24)     | 0.10 (0.05, 0.13)      | 0.09              |
| Macrophage Inhibitory Factor (MIF) | 0.19 (0.14, 0.25)            | 0.16 (0.11, 0.24)     | 0.17 (0.10, 0.25)      |                   |
| <b>Lipid Parameters</b>            |                              |                       |                        |                   |
| Apolipoprotein A1                  | 2.30 (1.98, 2.92)            | 2.10 (1.70, 2.55)     | 2.10 (1.70, 2.70)      | 0.02              |
| Apolipoprotein A2                  | 313 (243, 389)               | 346 (260, 412)        | 326 (294, 406)         | 0.04              |
| Apolipoprotein B                   | 910 (690, 1,218)             | 973 (670, 1,075)      | 942 (570, 1,175)       | 0.79              |
| Apolipoprotein C1                  | 360 (274, 418)               | 348 (244, 402)        | 354 (296, 397)         | 0.95              |
| Apolipoprotein C3                  | 320 (251, 470)               | 299 (216, 378)        | 302 (240, 436)         | 0.24              |
| Apolipoprotein H                   | 468 (380, 639)               | 465 (382, 616)        | 491 (426, 610)         | 0.11              |
| Apolipoprotein(a) aka Lp(a)        | 120 (46, 249)                | 89 (48, 232)          | 140 (76, 350)          | 0.73              |
| <b>Adipokines</b>                  |                              |                       |                        |                   |
| Adiponectin                        | 7.2 (4.4, 9.8)               | 7.4 (4.8, 10.5)       | 6.0 (4.4, 8.7)         | 0.51              |
| Leptin                             | 29 (19, 48)                  | 16 (9, 32)            | 22 (11, 44)            | 0.11              |
| Resistin                           | 2.70 (2.30, 3.53)            | 2.90 (1.95, 3.90)     | 3.20 (2.60, 4.40)      | 0.11              |
| <b>Atherothrombosis</b>            |                              |                       |                        |                   |
| Antithrombin III                   | 448 (388, 490)               | 466 (415, 542)        | 420 (378, 493)         | 0.95              |
| PAI-1                              | 74 (61, 111)                 | 77 (44, 117)          | 61 (35, 104)           | 0.26              |
| <b>Miscellaneous</b>               |                              |                       |                        |                   |
| hsTnT                              | 6.3 (3.0, 8.3)               | 3.0 (3.0, 8.7)        | 6.5 (3.0, 9.9)         | 0.50              |
| Nt-pro-BNP                         | 352 (155, 715)               | 434 (239, 1,115)      | 334 (196, 565)         | 0.93              |
| VCAM-1                             | 636 (565, 736)               | 616 (539, 678)        | 604 (520, 719)         | 0.83              |
| VEGF-A                             | 166 (120, 228)               | 145 (114, 192)        | 135 (104, 194)         | 0.67              |
| MMP-1                              | 6,480 (4,142, 9,339)         | 8,295 (4,640, 12,338) | 8,338 (5,607, 12,989)  | 0.07              |
| MMP-3                              | 7 (5, 14)                    | 6 (5, 11)             | 8 (4, 18)              | 0.55              |
| YKL-40                             | 23 (17, 45)                  | 28 (20, 54)           | 39 (25, 58)            | 0.30              |
| Cystatin-C                         | 1,165 (1,008, 1,398)         | 1,060 (960, 1,310)    | 1,200 (1,110, 1,315)   | 0.71              |
| Osteopontin                        | 33 (24, 40)                  | 37 (24, 47)           | 31 (24, 44)            | 0.78              |
| Osteoprotegrin (OPG)               | 8.00 (6.47, 9.62)            | 7.80 (6.50, 9.65)     | 8.50 (6.90, 11.00)     | 0.24              |

Tests for trend were performed using tertiles as an ordinal variable for continuous biomarkers.

**Table S5. Sensitivity Analysis of Linear Regression Results Assessing Relationship Between Z-Score of Candidate Biomarker at Baseline and Change in Target to Background Ratio in the TARGET Trial Cohort, with RA Treatment and Corticosteroids Included.**

|                                                                                                                                                                                                                                                                                                                                                                                                                                                                                                                                                         | <b>Selected biomarkers + PCE + Baseline TBR + RA Treatment + Corticosteroid Use</b> |
|---------------------------------------------------------------------------------------------------------------------------------------------------------------------------------------------------------------------------------------------------------------------------------------------------------------------------------------------------------------------------------------------------------------------------------------------------------------------------------------------------------------------------------------------------------|-------------------------------------------------------------------------------------|
| <b>Cytokine/Inflammation</b>                                                                                                                                                                                                                                                                                                                                                                                                                                                                                                                            | <b>Beta estimate (95% CI)</b>                                                       |
| IL-6                                                                                                                                                                                                                                                                                                                                                                                                                                                                                                                                                    | ...                                                                                 |
| sTNF-R1                                                                                                                                                                                                                                                                                                                                                                                                                                                                                                                                                 | <b>-0.09 (-0.18, 0.01)</b>                                                          |
| SAA                                                                                                                                                                                                                                                                                                                                                                                                                                                                                                                                                     | <b>-0.21 (-0.38, -0.03)</b>                                                         |
| hsCRP                                                                                                                                                                                                                                                                                                                                                                                                                                                                                                                                                   | <b>0.23 (0.06, 0.40)</b>                                                            |
| CD-40 ligand                                                                                                                                                                                                                                                                                                                                                                                                                                                                                                                                            | ...                                                                                 |
| <b>Adipokines</b>                                                                                                                                                                                                                                                                                                                                                                                                                                                                                                                                       |                                                                                     |
| Adiponectin                                                                                                                                                                                                                                                                                                                                                                                                                                                                                                                                             | <b>-0.07 (-0.16, 0.02)</b>                                                          |
| Leptin                                                                                                                                                                                                                                                                                                                                                                                                                                                                                                                                                  | ...                                                                                 |
| Resistin                                                                                                                                                                                                                                                                                                                                                                                                                                                                                                                                                | ...                                                                                 |
| <b>Atherothrombosis</b>                                                                                                                                                                                                                                                                                                                                                                                                                                                                                                                                 |                                                                                     |
| Antithrombin III                                                                                                                                                                                                                                                                                                                                                                                                                                                                                                                                        | ...                                                                                 |
| PAI-1                                                                                                                                                                                                                                                                                                                                                                                                                                                                                                                                                   | ...                                                                                 |
| <b>Lipids Parameters</b>                                                                                                                                                                                                                                                                                                                                                                                                                                                                                                                                |                                                                                     |
| Apolipoprotein A1                                                                                                                                                                                                                                                                                                                                                                                                                                                                                                                                       | ...                                                                                 |
| Apolipoprotein A2                                                                                                                                                                                                                                                                                                                                                                                                                                                                                                                                       | ...                                                                                 |
| Apolipoprotein B                                                                                                                                                                                                                                                                                                                                                                                                                                                                                                                                        | ...                                                                                 |
| Lp (a)                                                                                                                                                                                                                                                                                                                                                                                                                                                                                                                                                  | ...                                                                                 |
| LDL                                                                                                                                                                                                                                                                                                                                                                                                                                                                                                                                                     | ...                                                                                 |
| <b>Other Analytes</b>                                                                                                                                                                                                                                                                                                                                                                                                                                                                                                                                   |                                                                                     |
| hsTnT                                                                                                                                                                                                                                                                                                                                                                                                                                                                                                                                                   | ...                                                                                 |
| nt-pro-BNP                                                                                                                                                                                                                                                                                                                                                                                                                                                                                                                                              | ...                                                                                 |
| VCAM-1                                                                                                                                                                                                                                                                                                                                                                                                                                                                                                                                                  | ...                                                                                 |
| VEGF-A                                                                                                                                                                                                                                                                                                                                                                                                                                                                                                                                                  | ...                                                                                 |
| MMP-1                                                                                                                                                                                                                                                                                                                                                                                                                                                                                                                                                   | ...                                                                                 |
| MMP-3                                                                                                                                                                                                                                                                                                                                                                                                                                                                                                                                                   | ...                                                                                 |
| YKL-40                                                                                                                                                                                                                                                                                                                                                                                                                                                                                                                                                  | <b>0.11 (0.02, 0.20)</b>                                                            |
| Cystatin-C                                                                                                                                                                                                                                                                                                                                                                                                                                                                                                                                              | ...                                                                                 |
| Osteopontin (OPN)                                                                                                                                                                                                                                                                                                                                                                                                                                                                                                                                       | ...                                                                                 |
| Osteoprotegrin (OPG)                                                                                                                                                                                                                                                                                                                                                                                                                                                                                                                                    | <b>-0.11 (-0.20, -0.03)</b>                                                         |
| Pooled cohort equation                                                                                                                                                                                                                                                                                                                                                                                                                                                                                                                                  | 0.00 (-0.01, 0.01)                                                                  |
| RA treatment                                                                                                                                                                                                                                                                                                                                                                                                                                                                                                                                            | 0.00 (-0.17, 0.17)                                                                  |
| Corticosteroid use                                                                                                                                                                                                                                                                                                                                                                                                                                                                                                                                      | 0.04 (-0.15, 0.24)                                                                  |
| <b>Model Fit Statistics</b>                                                                                                                                                                                                                                                                                                                                                                                                                                                                                                                             |                                                                                     |
| Adjusted R <sup>2</sup>                                                                                                                                                                                                                                                                                                                                                                                                                                                                                                                                 | 0.31                                                                                |
| RMSE                                                                                                                                                                                                                                                                                                                                                                                                                                                                                                                                                    | 0.40                                                                                |
| <p>NOTES: All models include the baseline target to background ratios values from the most diseased segment (MDS TBR). PCE, Pooled Cohort Equation, includes age, sex, race, diabetes status, cigarette use, systolic blood pressure, treatment for hypertension, and high-density lipoprotein value. R<sup>2</sup> indicates better model fit when larger and RMSE, Root Mean Square Error, is better when smaller. Bolded values have p ≤ 0.10 and were advanced to the selected biomarkers model. RA treatments included TNFi or triple therapy.</p> |                                                                                     |
